# Supplementary material for: Overexpression of Shox2 Leads to Congenital Dysplasia of the Temporomandibular Joint in Mice
Source: PubMed Central journal article supplement (PMC4159784; doi:10.3390/ijms150813135), 2014-07-24
Supplement: ijms-15-13135-s001.pdf [file ijms-15-13135-s001.pdf]

# Supplementary Information

## 1. Pires2-Ha-Shox2a Transfect in the NIH-3T3 Cells

NIH-3T3 murine fibroblast cells were cultured in Dulbecco's modified Eagle medium (DMEM) containing 10% fetal calf serum, 2 mM glutamine, 100 U/mL penicillin, and 100 mg/mL streptomycin at 37 °C and 5% CO<sub>2</sub> atmosphere. NIH-3T3 cells were seeded in 6-well cell culture plates with  $2 \times 10^5$  cells per well, and were grown to semi-confluence. 20 µg of *Pires2-Ha-Shox2a* complexes with 20 µL of Lipofectin<sup>®</sup>, a cationic lipid transfection reagent, was used as a positive control and untreated cells were used as a negative control. After 72 h post-transfection, the expression of GFP in the cells was observed by a fluorescence microscope. Total RNA was isolated from post-transfection cells using TRIzol reagent (Invitrogen, Carlsbad, CA, USA). Reverse transcription was performed using random primers and Superscript<sup>™</sup> III (Invitrogen, Carlsbad, CA, USA). Differential gene expressions were analyzed using the Agilent Technologies Oligonucleotide Microarrays.

## 2. Overexpression Shox2 Enhances the Matrix Metalloproteinases (MMPs) in the NIH-3T3 Cells

Qualitative analysis of transfection of NIH-3T3 cells by *Pires2-Ha-Shox2a* was carried out by fluorescence microscopy. Transfection efficiency was almost 30% at the end of 72 h. To explore the differential mRNA expression of overexpression *Shox2* on the NIH-3T3 cells using the Agilent Technologies Oligonucleotide Microarrays, we found that 199 genes are expressed in both transfection and untransfection cells, of these genes, 70 genes were down-regulated, while 129 genes were up-regulated in post-transfection cells compared to control cells at the fold-change  $\geq 1.50$ . To focus on the effect of overexpression *Shox2* on the catabolism and anabolism of bone and cartilage, the alteration of *MMPs* was taken. The mRNA expressions of *MMP3* (1.79-fold), *MMP10* (1.58-fold) and *MMP13* (2.62-fold) associated with extracellular matrix (ECM) degeneration increased respectively in the post-transfection cells compared to control cells, indicating that *MMPs* alterations are responsible for the TMJ dysplasia in the *Wnt1-Cre; pMes-stop Shox2* mice.
